# Supplementary material for: First bodipy–DOTA derivatives as probes for bimodal imaging
Source: Royal Society of Chemistry journal article supplement (doi:10.1039/c0cc02749a), 2010-01-01
Supplement: c0cc02749a.pdf [file c0cc02749a.pdf]

## First bodipy-DOTA derivatives as probes for bimodal imaging

Claire Bernhard, Christine Goze, Yoann Rousselin and Franck Denat\*

### Experimental Section

**General:** All the chemicals used to prepare the title compounds including InCl<sub>3</sub>, GaCl<sub>3</sub>, Cu(NO<sub>3</sub>)<sub>2</sub>, 2.5 H<sub>2</sub>O were purchased from Acros. Tris-*t*-butyl 2,2',2''-(1,4,7,10-tetraazacyclododecane-1,4,7-triyl)triacetate was obtained from CheMatech<sup>®</sup> and used without further purification. The <sup>1</sup>H and <sup>13</sup>C NMR spectra were recorded at room temperature or at 330K. NMR spectra were run on BRUKER Avance 300 and 600 spectrometers using perdeuterated solvents as internal standard. Elemental analyses were obtained on EA 1108 CHNS Fisons Instrument. Absorption spectra were recorded on a VARIAN CARY 50. Matrix-Assisted Laser Desorption Ionisation Time-Of-Flight (MALDI-TOF) mass spectrometry was carried out using a Bruker Daltonics Proflex III spectrometer. ESI (Electro Spray Ionisation) High resolution and accurate mass measurements (HRMS) were carried out using a Bruker microTOF-Q<sup>TM</sup> ESI-TOF mass spectrometer. The steady-state fluorescence emission and excitation spectra were obtained by using a Fluorolog-3 instrument. The fluorescence quantum yield ( $\Phi_{\text{exp}}$ ) was calculated from equation 1.

$$\Phi_{\text{exp}} = \Phi_{\text{ref}} \frac{F \{1 - \exp(-A_{\text{ref}} \ln 10)\} n^2}{F_{\text{ref}} \{1 - \exp(-A \ln 10)\} n_{\text{ref}}^2}$$

Equation 1

Here,  $F$  denotes the integral of the corrected fluorescence spectrum,  $A$  is the absorbance at the excitation wavelength, and  $n$  is the refractive index of the medium. The reference system used was rhodamine 6G ( $\Phi = 0.78$  in H<sub>2</sub>O,  $\lambda_{\text{exc}} = 488$  nm).<sup>i</sup> All the spectrometers were available at the "Plateforme d'Analyse Chimique et de Synthèse Moléculaire de l'Université de Bourgogne" (PACSMUB).

**X-ray equipment and refinement:** diffraction data were collected on a Nonius Kappa Apex-II CCD diffractometer equipped with a nitrogen jet stream low-temperature system (Oxford Cryosystems). The X-ray source was graphite-monochromated Mo- $K\alpha$  radiation ( $\lambda = 0.71073 \text{ \AA}$ ) from a sealed tube. The lattice parameters were obtained by least-squares fit to the optimized setting angles of the entire set of collected reflections. No significant temperature drift was observed during the data collections. Data were reduced by using DENZO<sup>ii</sup> software, without applying absorption corrections. The missing absorption corrections were partially compensated by the data scaling procedure in the data reduction. The structure was solved by direct methods using the SIR92<sup>iii</sup> program. Refinements were carried out by full-matrix least-squares on  $F^2$  using the SHELXL97<sup>iv</sup> program on the complete set of reflections. Anisotropic thermal parameters were used for non-hydrogen atoms. All H atoms, on carbon atom, were placed at calculated positions using a riding model with C-H = 0.95  $\text{\AA}$  (aromatic), C-H = 0.99  $\text{\AA}$  (methylene) or 0.98  $\text{\AA}$  (methyl) with  $U_{\text{iso}}(\text{H}) = 1.2U_{\text{eq}}(\text{CH})$ ,  $U_{\text{iso}}(\text{H}) = 1.2U_{\text{eq}}(\text{CH}_2)$  or  $U_{\text{iso}}(\text{H}) = 1.5U_{\text{eq}}(\text{CH}_3)$ .

**Crystal structure determination of 11:** *Crystal data.*  $\text{C}_{36}\text{H}_{43}\text{BCl}_2\text{F}_2\text{N}_6\text{O}_4$ ,  $M = 743.47$ , red prism crystal of dimensions  $0.07 \times 0.05 \times 0.05 \text{ mm}^3$ , triclinic, space group  $P-1$ ,  $a = 9.5109(4) \text{ \AA}$ ,  $b = 12.5631(6) \text{ \AA}$ ,  $c = 16.3648(8) \text{ \AA}$ ,  $\alpha = 101.572(2)^\circ$ ,  $\beta = 103.112(3)^\circ$ ,  $\gamma = 99.345(3)^\circ$ ,  $V = 1820.86(15) \text{ \AA}^3$ ,  $Z = 2$ ,  $T = 115(2) \text{ K}$ ,  $F(000) = 780$ ,  $D_c = 1.356 \text{ g.cm}^{-3}$ ,  $\lambda(\text{Mo-K}\alpha) = 0.71073 \text{ \AA}$ ,  $\mu(\text{Mo-K}\alpha) = 0.237 \text{ mm}^{-1}$ , 13572 reflections collected in the range  $1.87 \leq \theta \leq 27.54^\circ$ , 8217 unique. The maximum and minimum residual electron densities are 0.416 and  $-0.955 \text{ e.\AA}^{-3}$ . The final agreement factors are  $R(F) = 0.0979$  and 0.1499, and  $wR(F^2) = 0.1917$  and 0.2229, for  $I > 2\sigma(I)$  and all data, respectively. CCDC-785489 contains the supplementary crystallographic data for this paper. These data can be obtained free of charge from The Cambridge Crystallographic Data centre via [www.ccdc.cam.ac.uk/data\\_request/cif](http://www.ccdc.cam.ac.uk/data_request/cif).

**Synthesis of compound 1<sup>v</sup>:** *N*-hydroxysuccinimide (54 mg, 0.48 mmol), 4-(dimethylamino)-pyridine (DMAP) (58 mg, 0.48 mmol) and 1-(3-dimethylaminopropyl)-3-ethylcarbodiimide hydrochloride (EDCI) (92 mg, 0.48 mmol) were successively added to a solution of 4-carboxyphenyl-1,3,5,7-tetramethyl-2,6-diethyl-4-bora-3a,4a-diaza-s-indacene<sup>vi</sup> (100 mg, 0.24

mmol) in CH<sub>2</sub>Cl<sub>2</sub> (50 mL), and the solution was stirred at room temperature. After total consumption of the starting material (2 hours) followed by TLC (AcOEt/hexane 1:1, R<sub>f</sub> = 0.5) the mixture was washed with water (2\* 10 mL). The organic phase was dried over MgSO<sub>4</sub> and the solvent was evaporated to give a red oil. The crude product was purified by column chromatography on silica gel (AcOEt/hexane 1:1) to give **1** as a red solid (88 mg, 70%). <sup>1</sup>H NMR (300 MHz, CDCl<sub>3</sub>, 300K) δ(ppm): 0.96 (t, 6H, <sup>3</sup>J = 7.5 Hz), 1.25 (s, 6H), 2.27 (q, 4H, <sup>3</sup>J = 7.5 Hz), 2.51 (s, 6H), 2.92 (s, 4H), 7.47 (d, 2H, <sup>3</sup>J = 8.3 Hz), 8.23 (d, 2H, <sup>3</sup>J = 8.3 Hz); <sup>13</sup>C{<sup>1</sup>H} NMR (75 MHz, CDCl<sub>3</sub>, 300K) δ(ppm): 12.1, 12.7, 14.6, 17.3, 25.7, 125.6, 129.3, 131.2, 133.3, 137.7, 138.0, 138.7, 143.0, 154.6, 161.4, 169.2; ESI-MS: *m/z* = 544.21 [M+Na]<sup>+</sup>; UV-Vis (CH<sub>3</sub>CN), λ (nm) (ε, M<sup>-1</sup>cm<sup>-1</sup>): 525 (73000), 492 (23200), 378 (7950); Anal.Calcd for C<sub>28</sub>H<sub>30</sub>BF<sub>2</sub>N<sub>3</sub>O<sub>4</sub>: C, 68.50; H, 6.67; N, 6.39; found: C, 68.78; H, 6.87; N, 5.95.

**Synthesis of compound 2<sup>vii</sup>:** 1-(ethylacetate)-4,7,10-tris(tert-butoxycarbonylmethyl)-1,4,7,10-tetraazacyclododecane<sup>viii</sup> (11.2 g, 0.018 mol) was dissolved in ethylenediamine (15 mL) and the mixture was stirred at room temperature for 78h. The solvent was evaporated, 200 mL of water was added and the product was extracted with dichloromethane (2\*300 mL). The organic phase was dried over MgSO<sub>4</sub> and the solvent was evaporated. The yellow oil was taken in pentane (500 mL) and the impurities were removed by filtration. After evaporation of the solvent, pure compound **2** was obtained as a colorless oil (m = 7.2 g, 65%). <sup>1</sup>H NMR (300 MHz, CDCl<sub>3</sub>, 300 K) δ (ppm): 1.35 (s, 18H), 1.36 (s, 9H), 2.41-2.45 (m, 4H), 2.59-2.65 (m, 4H), 2.69-2.65 (t, 2H, <sup>3</sup>J = 6.4 Hz), 2.73-2.77 (m, 4H), 2.77-2.81 (m, 4H), 2.98 (s, 2H), 3.15 (s, 4H), 3.18 (s, 2H), 3.20-3.24 (td, 2H, <sup>3</sup>J = 6.4 Hz, <sup>3</sup>J = 6.5 Hz), 8.63 (bs, 1H, NH); <sup>13</sup>C{<sup>1</sup>H} NMR (75 MHz, CDCl<sub>3</sub>, 300 K) δ (ppm): 28.4, 42.3, 42.0, 52.2, 52.6, 53.7, 55.1, 56.4, 57.1, 52.3, 81.0, 81.2, 170.6, 170.8, 172.8; MALDI-TOF: *m/z* = 615.14 [M+H]<sup>+</sup>, 637.14 [M+Na]<sup>+</sup>; Anal.Calcd for C<sub>30</sub>H<sub>58</sub>N<sub>6</sub>O<sub>7</sub>: C, 57.89; H, 9.53; N, 13.47; found: C, 58.07; H, 9.92; N, 13.14.

**Synthesis of compound 3:** Compound **2** (2 g, 3.2 mmol) was dissolved in 35% HCl (20 mL) and the solution was stirred for 30 min at room temperature. After evaporation of the solvent, acetone was added (20 mL) and the mixture was stirred for 1 hour. Then, the precipitate was filtered, washed with acetone (50 mL), and diethylether (50 mL) to give **3** (+ 3 HCl) as a white solid. (1.5 g, 95 %). <sup>1</sup>H NMR (300 MHz, D<sub>2</sub>O+NaOD (pH = 7), 300K) δ(ppm): 2.79-3.00 (m, 4H), 3.05-3.23 (m, 6H), 3.32-3.35 (m, 2H), 3.38-3.42 (m, 2H), 3.43-3.69 (m, 10H),

3.84 (s, 4H);  $^{13}\text{C}\{^1\text{H}\}$  NMR (75 MHz,  $\text{D}_2\text{O}+\text{NaOD}$  (pD = 7), 300K)  $\delta(\text{ppm})$ : 36.7, 36.9, 48.4, 48.8, 50.5, 52.2, 56.1, 56.4, 57.3, 170.1, 173.3, 178.9; ESI-MS:  $m/z = 447.26$   $[\text{M}+\text{H}]^+$ , 893.53  $[2\text{M}+\text{H}]^+$ , 915.51  $[2\text{M}+\text{Na}]^+$ ; Anal. Calcd for  $\text{C}_{18}\text{H}_{34}\text{N}_6\text{O}_7, 3\text{HCl}, 1.8\text{H}_2\text{O}$ : C, 36.75; H, 14.29; N, 6.95; found: C, 37.20; H, 13.89; N, 7.02.

**Synthesis of compound 4:** Diisopropylethylamine was added to a solution of **3** (400 mg, 0.7 mmol) in water until pH = 12. A solution of bodipy **1** (330 mg, 0.6 mmol) in  $\text{CH}_3\text{CN}$  (20 mL) was then added and the mixture was stirred at  $35^\circ\text{C}$  during 12h, until total consumption of the starting materials was observed by TLC (EtOH/ $\text{NH}_4\text{OH}$  9:1,  $R_f = 0.4$ ). The solvent was evaporated, and the resulting red oil was purified by column chromatography on silica gel ( $\text{CH}_2\text{Cl}_2/\text{EtOH}/\text{NH}_4\text{OH}$  2:7:1). Recrystallization from  $\text{CH}_2\text{Cl}_2/\text{hexane}$  gave the desired compound as a red solid (m = 230 mg, 45%).  $^1\text{H}$  NMR (600 MHz, MeOD, 330K)  $\delta(\text{ppm})$ : 0.99 (t, 6H,  $^3J = 7.5$  Hz), 1.33 (s, 6H), 2.35 (q, 4H,  $^3J = 7.5$  Hz), 2.48 (s, 6H), 2.82-3.04 (m, 8H), 3.21-3.33 (m, 8H), 3.35 (s, 4H), 3.49-3.53 (m, 2H), 3.53-3.60 (m, 4H), 3.61-3.65 (m, 2H), 7.44 (d, 2H,  $^3J = 8.3$  Hz), 8.09 (d, 2H,  $^3J = 8.3$  Hz);  $^{11}\text{B}$  NMR (128 MHz,  $\text{CDCl}_3$ , 300K): 0.73 ppm (t,  $^1J_{\text{B,F}} = 32.8$  Hz); ESI-MS:  $m/z = 851.45$   $[\text{M}-\text{H}]^-$ , 889.40  $[\text{M}-2\text{H}+\text{K}]^-$ ; UV-Vis ( $\text{CH}_3\text{CN}$ ),  $\lambda$  (nm) ( $\epsilon$ ,  $\text{M}^{-1}\text{cm}^{-1}$ ) 523 (sh, 31000), 492 (sh, 11100), 378 (3700); HRMS ESI:  $m/z = \text{calcd for } \text{C}_{42}\text{H}_{59}\text{BF}_2\text{N}_8\text{O}_8-2\text{H}+\text{K}: 889.4010$ ; found: 889.3922.

**Synthesis of compound 5:** Indium chloride (25 mg, 0.12 mmol) was added to a solution of **4** (100 mg, 0.12 mmol) in methanol/water (8:2, 10 mL). The mixture was stirred at  $35^\circ\text{C}$  for 2h until total consumption of the starting materials was observed by TLC (EtOH/  $\text{NH}_4\text{OH}$  8:2,  $R_f = 0.3$ ). The complex was purified by column chromatography over silica gel ( $\text{CH}_2\text{Cl}_2/\text{EtOH}/\text{NH}_4\text{OH}$  1:8:2) to yield compound **5** as a red solid (95 mg, 85%).  $^1\text{H}$  NMR (300 MHz, DMSO 300K)  $\delta(\text{ppm})$ : 0.94 (t, 6H,  $^3J = 7.5$  Hz), 1.24 (s, 6H), 2.29 (m, 4H), 2.44 (s, 6H), 2.61-2.92 (m, 10H), 2.97-3.25 (m, 12H), 3.37-3.56 (m, 6H), 7.49 (d, 2H,  $^3J = 8\text{Hz}$ ), 8.03 (d, 2H,  $^3J = 8\text{Hz}$ ), 8.74 (bs, 1H);  $^{11}\text{B}$  NMR (128 MHz,  $\text{CDCl}_3$ , 300K): 0.60 ppm (t,  $^1J_{\text{B,F}} = 33.3$  Hz); UV-Vis ( $\text{H}_2\text{O}$ ),  $\lambda$  (nm) ( $\epsilon$ ,  $\text{M}^{-1}\text{cm}^{-1}$ ): 527 (32200), 491 (sh, 14150), 380 (5350); HRMS-MS:  $m/z$ : calcd for  $\text{C}_{42}\text{H}_{56}\text{BF}_2\text{InN}_8\text{O}_8-\text{H}$ : 963.32557; found: 963.32625.

**Synthesis of compound 6:** Gallium chloride (18 mg, 0.12 mmol) was added to a solution of **4** (100 mg, 0.12 mmol) in methanol/water (8:2, 8 mL). The mixture was stirred at 35°C for 2 hours, during which a precipitate was formed. The precipitate could be isolated by centrifugation, to yield compound **6** as a red solid (100 mg, 92%). UV-Vis (H<sub>2</sub>O),  $\lambda$  (nm) ( $\epsilon$ , M<sup>-1</sup>cm<sup>-1</sup>): 523 (33900), 492 (sh, 11350), 378 (3750); HRMS-MS:  $m/z$ : calcd for C<sub>42</sub>H<sub>56</sub>BF<sub>2</sub>GaN<sub>8</sub>O<sub>8</sub>-H: 917.34725; found: 917.35050; Anal.Calcd for C<sub>42</sub>H<sub>56</sub>BF<sub>2</sub>GaN<sub>8</sub>O<sub>8</sub>.CH<sub>3</sub>OH: C, 54.28; H, 6.36; N, 11.78; found: C, 53.82; H, 6.72; N, 12.34.

**Synthesis of compound 7:** Copper nitrate hemipentahydrate (22 mg, 0.09 mmol) was added to a solution of **4** (82 mg, 0.09 mmol) in ethanol (6 mL). The mixture was stirred at 35°C for 2 hours until total consumption of the starting materials was observed by TLC (EtOH/NH<sub>4</sub>OH 9:1, R<sub>f</sub> = 0.3). The complex was purified by column chromatography over silica gel (EtOH/NH<sub>4</sub>OH 9:1) to yield compound **7** as a red solid (69 mg, 84%). UV-Vis (H<sub>2</sub>O),  $\lambda$  (nm) ( $\epsilon$ , M<sup>-1</sup>cm<sup>-1</sup>): 523 (30500), 492 (sh, 13400), 378 (6500); HRMS-MS:  $m/z$ : calcd for C<sub>42</sub>H<sub>57</sub>BF<sub>2</sub>CuN<sub>8</sub>O<sub>8</sub>-H: obtained 912.35513; found: 912.35909; Anal.Calcd for C<sub>42</sub>H<sub>57</sub>BF<sub>2</sub>CuN<sub>8</sub>O<sub>8</sub>.NH<sub>3</sub>: C, 54.16; H, 6.49; N, 13.54; found: C, 54.62; H, 5.97; N, 13.75.

**Synthesis of compound 10:** N-hydroxybenzotriazole (180 mg, 1.3 mmol), diisopropylethylamine (DIPEA) (340 mg, 2.6 mmol), 1-(3-dimethylaminopropyl)-3-ethylcarbodiimide hydrochloride (EDCI) (250 mg, 1.3 mmol) and **9** (340 mg, 1.3 mmol) were successively added to a solution of **8** (550 mg, 1.3 mmol) in dry DMF (30 mL), and the solution was stirred at room temperature. After total consumption of the starting material (8 hours) followed by TLC (AcOEt/hexane 6:4, R<sub>f</sub> = 0.6), the solvent was evaporated. The solid obtained was washed with water (2\* 30 mL) and extracted with dichloromethane (100 mL). The organic phase was dried over MgSO<sub>4</sub> and the solvent was evaporated to give a red oil. The crude product was purified by column chromatography on silica gel (AcOEt/hexane 1:1). Recrystallization in CH<sub>2</sub>Cl<sub>2</sub>/hexane gave pure **10** as red-green crystals (630 mg, 76%). <sup>1</sup>H NMR (300 MHz, CDCl<sub>3</sub>, 300K)  $\delta$ (ppm): 0.93 (t, 6H, <sup>3</sup>J = 7.5 Hz), 1.23 (s, 6H), 2.28 (q, 4H, <sup>3</sup>J = 7.5 Hz), 2.51 (s, 6H), 3.34 (dd, 1H, <sup>3</sup>J = 13.9 Hz, 6.2 Hz), 3.45 (dd, 1H, J = 13.9 Hz, 5.1 Hz), 3.79 (s, 3H), 5.14 (ddd, 1H, <sup>3</sup>J = 7.0 Hz, <sup>3</sup>J = 6.2 Hz, <sup>3</sup>J = 5.1 Hz), 6.75 (d, 1H, <sup>3</sup>J = 7.0 Hz), 7.33 (d, 2H, <sup>3</sup>J = 8.7 Hz), 7.40 (d, 2H, <sup>3</sup>J = 8.2 Hz), 7.88 (d, 2H, <sup>3</sup>J = 8.3 Hz); 8.15 (d, 2H, <sup>3</sup>J = 8.7 Hz); <sup>13</sup>C{<sup>1</sup>H} NMR (75 MHz, CDCl<sub>3</sub>, 300K)  $\delta$ (ppm): 11.9, 12.6, 14.6, 17.1,

37.9, 52.8, 53.5, 123.8, 127.7, 129.1, 130.2, 130.3, 133.2, 133.7, 138.1, 138.5, 140.0, 143.7, 147.3, 154.4, 166.2, 171.6;  $^{11}\text{B}$  NMR (128 MHz,  $\text{CDCl}_3$ , 300K): 0.78 ppm (t,  $J_{B,F} = 33.4$  Hz); UV-Vis ( $\text{CH}_3\text{CN}$ ),  $\lambda$  (nm) ( $\epsilon$ ,  $\text{M}^{-1}\text{cm}^{-1}$ ): 523 (63000), 492 (21100), 378 (6800); HRMS-ESI  $m/z$ : calcd for  $\text{C}_{34}\text{H}_{37}\text{BF}_2\text{N}_4\text{O}_5 + \text{H}$ : 631.2903; found: 531.2897. Anal. Calcd for  $\text{C}_{34}\text{H}_{37}\text{BF}_2\text{N}_4\text{O}_5 + 0.3 \text{CH}_2\text{Cl}_2$ : C, 63.56; H, 5.82; N, 8.65; found: C, 63.44; H, 6.25; N, 8.63.

**Synthesis of compound 11:** A solution of compound **10** (1.7 g, 2.7 mmol) and ethylenediamine (11.3 g, 0.18 mol) in 90 mL of methanol was stirred at 55°C for 48h. The solvent was evaporated, water was added (100 mL) and the product was extracted with dichloromethane (2\*300 mL). The organic phase was dried over  $\text{MgSO}_4$  and the solvent was evaporated. The crude product was washed with hexane (200 mL), and the solid obtained was purified by column chromatography on silica gel ( $\text{CH}_2\text{Cl}_2/\text{MeOH}/\text{NH}_4\text{OH}$  80:18:2). Recrystallization in  $\text{CH}_2\text{Cl}_2/\text{hexane}$  gave pure **11** as red crystals (1.4 g, 79%).  $^1\text{H}$  NMR (300 MHz,  $\text{CDCl}_3$ , 300K)  $\delta$ (ppm): 0.95 (t, 6H,  $^3J = 7.5$  Hz), 1.22 (s, 6H), 2.27 (q, 4H,  $^3J = 7.5$  Hz), 2.51 (s, 6H), 2.64-2.81 (m, 2H), 3.18-3.36 (m, 2H), 4.87 (ddd, 1H,  $^3J = 7.0$  Hz,  $^3J = 6.2$  Hz,  $^3J = 5.1$  Hz), 6.36 (t, 1H,  $^3J = 5.5$  Hz, NH), 7.09 (d, 1H,  $^3J = 7.0$  Hz, NH), 7.38 (d, 2H,  $^3J = 8.2$  Hz), 7.45 (d, 2H,  $^3J = 8.5$  Hz); 7.88 (d, 2H,  $^3J = 8.2$  Hz), 8.16 (d, 2H,  $^3J = 8.5$  Hz);  $^{11}\text{B}$  NMR (128 MHz,  $\text{CDCl}_3$ , 300K): 0.77 ppm (t,  $J_{B,F} = 33.3$  Hz); UV-Vis ( $\text{CH}_2\text{Cl}_2$ ),  $\lambda$  (nm) ( $\epsilon$ ,  $\text{M}^{-1}\text{cm}^{-1}$ ): 528 (76500), 493 (23300), 379 (9650); ESI-MS:  $m/z = 639.32$  [ $\text{M-F}$ ] $^+$ , 659.33 [ $\text{M+H}$ ] $^+$ ; Anal. Calcd for  $\text{C}_{35}\text{H}_{41}\text{BF}_2\text{N}_6\text{O}_4 + 0.7 \text{CH}_2\text{Cl}_2$ : C, 59.72; H, 5.95; N, 11.70; found: C, 60.05; H, 5.79; N, 11.34.

**Synthesis of compound 13:** To a solution of compound **11** (230 mg, 0.34 mmol) and 170  $\mu\text{L}$  of  $\text{Et}_3\text{N}$  (6 equivalents) in dry DMF (25 mL) was added a solution of DOTA-NHS ester **12** (200 mg, 0.28 mmol) in dry DMF (5 mL). The mixture was stirred at room temperature for 12h. Then the solvent was evaporated and the crude product was purified by column chromatography on silica gel ( $\text{EtOH}/\text{NH}_4\text{OH}$  9:1). The solid obtained was washed with hexane (20 mL) and acetonitrile (20 mL). The compound **13** was isolated as a red solid (230 mg, 65%).  $^1\text{H}$  NMR (600 MHz, MeOD, 330K)  $\delta$ (ppm): 1.01 (t, 6H,  $^3J = 7.5$  Hz), 1.31 (s, 6H), 2.36 (q, 4H,  $^3J = 7.5$  Hz), 2.49 (s, 6H), 2.92-3.02 (m, 4H), 3.05-3.15 (m, 4H), 3.34-3.56 (m, 18H), 3.66-3.77 (m, 4H), 5.01-5.06 (m, 1H), 7.41 (d, 2H,  $^3J = 8.2$  Hz), 7.63 (d, 2H,  $^3J = 8.5$  Hz); 7.99 (d, 2H,  $^3J = 8.2$  Hz), 8.12 (d, 2H,  $^3J = 8.5$  Hz);  $^{11}\text{B}$  NMR (128 MHz, MeOD, 300K):

0.72 ppm (t,  $J_{B,F} = 33.2$  Hz); UV-Vis (DMF),  $\lambda$  (nm) ( $\epsilon$ ,  $M^{-1}cm^{-1}$ ): 523 (64400), 491 (21400), 379 (6800); ESI-MS:  $m/z = 1067.49 [M+Na]^+$ , 1089.47  $[M+2Na-H]^+$ , 1111.46  $[M+3Na-2H]^+$ , Anal.Calcd for  $C_{51}H_{67}BF_2N_{10}O_{11} + 6.5 H_2O, NH_4$ : C, 51.91; H, 7.17; N, 13.06; found: C, 51.75; H, 6.53; N, 12.38.

**Synthesis of compound 14:** A suspension of compound **13** (50 mg, 47.8  $\mu$ mol) and 10 % Pd/C (5mg, 19.2  $\mu$ mol) in a mixture of water and ethanol ( $H_2O/EtOH$ , 90/10, 5 mL) was stirred under  $H_2$ . After consumption of hydrogen, the suspension was eliminated by filtration on Clarcel<sup>®</sup> and the solvent was evaporated. The solid obtained was washed with hexane (10 mL), to give compound **14** as a red solid (45 mg, 95%).  $^1H$  NMR (300 MHz, MeOD, 300K)  $\delta$ (ppm): 0.88 (t, 6H,  $^3J = 7.5$  Hz), 1.18 (s, 6H), 2.24 (q, 4H,  $^3J = 7.5$  Hz), 2.37 (s, 6H), 2.62-3.05 (m, 8H), 3.20-3.70 (m, 22H), 4.54-4.63 (m, 1H), 6.57 (d, 2H,  $^3J = 8.2$  Hz), 6.96 (d, 2H,  $^3J = 8.5$  Hz); 7.33 (d, 2H,  $^3J = 8.2$  Hz), 7.88 (d, 2H,  $^3J = 8.5$  Hz);  $^{11}B$  NMR (128 MHz, MeOD, 300K): 0.71 ppm (t,  $J_{B,F} = 33.2$  Hz); UV-Vis (DMF),  $\lambda$  (nm) ( $\epsilon$ ,  $M^{-1}cm^{-1}$ ): 523 (60200), 491 (19200), 379 (5600); ESI-MS:  $m/z = 1051.43 [M+K-2H]^-$

**Synthesis of compound 15:** To a solution of **14** (15 mg, 14.7  $\mu$ mol) in  $H_2O$  (5 mL) was added at room temperature a solution of thiophosgene (3.5  $\mu$ L, 44.3  $\mu$ mol) in chloroform (2 mL). The solution was stirred vigorously during 2h. The solvent was evaporated and the residue was lyophilized. The crude product was washed with  $CH_2Cl_2$  (2 mL) and hexane (5 mL) to give **15** as a red solid (13.5 mg, 90%); UV-Vis (DMSO),  $\lambda$  (nm) ( $\epsilon$ ,  $M^{-1}cm^{-1}$ ): 523 (43000), 492 (14400), 378 (4600); ESI-MS:  $m/z = 1077.45 [M+Na-2H]^-$ ; 1093.41  $[M+K-2H]^-$ ; 1099.42  $[M+2Na-3H]^-$

**Lists of Figures and Tables:**

**Fig. 1:** HRMS spectrum of **5** (experimental and calculated)

**Fig. 2:** HRMS spectrum of **6** (experimental and calculated)

**Fig. 3:** HRMS spectrum of **7** (experimental and calculated)

**Fig. 4:**  $^1\text{H}$  NMR spectrum of **13** (600 MHz, MeOD, 330K)

**Fig. 5:** ESI-MS spectrum of **15**

**Photophysical studies:**

**Fig. 6:** Absorption (\_\_\_\_) and emission (.....) of **4** in  $\text{H}_2\text{O}$

**Fig. 7:** Absorption (\_\_\_\_) and emission (.....) of **5** in  $\text{H}_2\text{O}$

**Fig. 8:** Absorption (\_\_\_\_) and emission (.....) of **6** in  $\text{H}_2\text{O}$ .

**Fig. 9:** Absorption (\_\_\_\_) and emission (.....) of **7** in  $\text{H}_2\text{O}$ .

**X-ray analysis:**

**Fig. 10:** ORTEP view of compound **11**, showing thermal ellipsoid at the 50% probability level.

**Fig. 11:** ORTEP view of intermolecular H-bond in crystal of **11**, showing thermal ellipsoid at the 50% probability level. For clarity, only hydrogen involved in intermolecular hydrogen bonds are represented by dashed lines.

**Table 1:** Bond lengths [ $\text{\AA}$ ] and angles [ $^\circ$ ] for **11**.

**Table 2:** Hydrogen bonds for **11** [ $\text{\AA}$  and  $^\circ$ ].

---



## Mass Spectrum Report

### Analysis Info

Analysis Name 10cb\_691neg.d  
 Method tune\_wide.m  
 Sample Name < No Sample >  
 Comment meoh

Acquisition Date 4/15/2010 3:12:47 PM

Operator Marie-José Penouilh  
 Instrument micrOTOF-Q 56

### Acquisition Parameter

|             |            |                       |           |                  |           |
|-------------|------------|-----------------------|-----------|------------------|-----------|
| Source Type | ESI        | Ion Polarity          | Negative  | Set Nebulizer    | 0.5 Bar   |
| Focus       | Not active | Set Capillary         | 4500 V    | Set Dry Heater   | 180 °C    |
| Scan Begin  | 50 m/z     | Set End Plate Offset  | -500 V    | Set Dry Gas      | 4.0 l/min |
| Scan End    | 3000 m/z   | Set Collision Cell RF | 200.0 Vpp | Set Divert Valve | Source    |

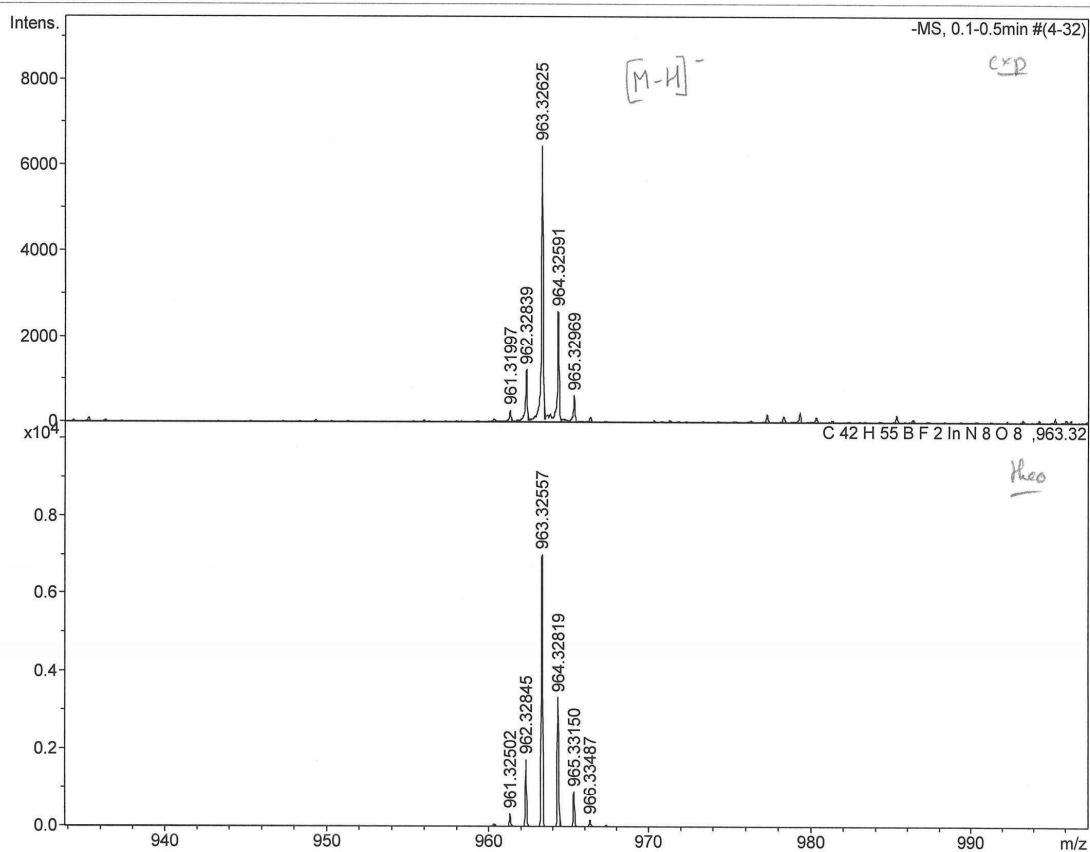

| Meas. m/z | # | Formula                    | Score  | m/z       | err [mDa] | err [ppm] | mSig ma | rdb  | e <sup>-</sup> Conf | N-R ule |
|-----------|---|----------------------------|--------|-----------|-----------|-----------|---------|------|---------------------|---------|
| 963.32625 | 1 | C 42 H 55 B F 2 In N 8 O 8 | 100.00 | 963.32556 | -0.7      | -0.7      | 38.2    | 19.5 | even                | ok      |

Fig. 1: HRMS spectrum of **5** (experimental and calculated).

## Mass Spectrum Report

### Analysis Info

Analysis Name 10cb\_692neg.d  
 Method tune\_wide.m  
 Sample Name < No Sample >  
 Comment meoh

Acquisition Date 4/15/2010 3:15:56 PM

Operator Marie-José Penouilh  
 Instrument micrOTOF-Q 56

### Acquisition Parameter

|             |            |                       |           |                  |           |
|-------------|------------|-----------------------|-----------|------------------|-----------|
| Source Type | ESI        | Ion Polarity          | Negative  | Set Nebulizer    | 0.5 Bar   |
| Focus       | Not active | Set Capillary         | 4500 V    | Set Dry Heater   | 180 °C    |
| Scan Begin  | 50 m/z     | Set End Plate Offset  | -500 V    | Set Dry Gas      | 4.0 l/min |
| Scan End    | 3000 m/z   | Set Collision Cell RF | 200.0 Vpp | Set Divert Valve | Source    |

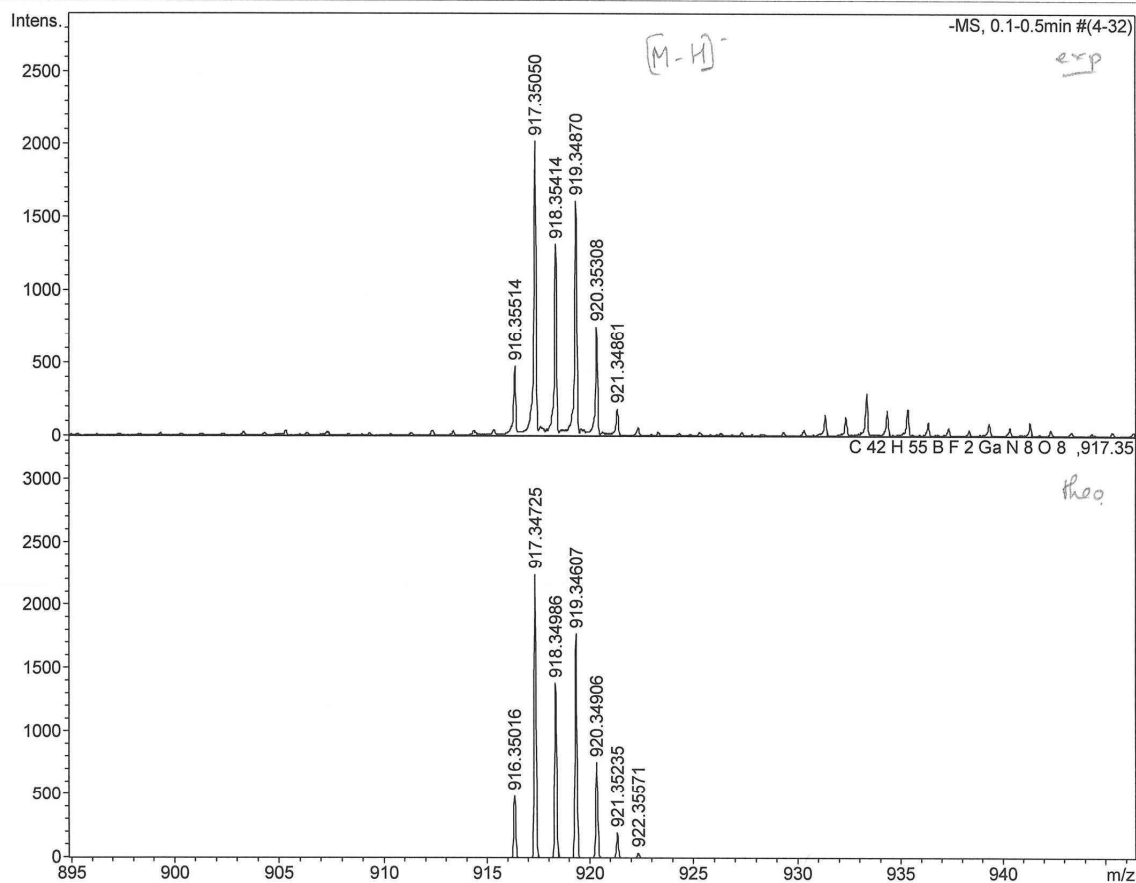

| Meas. m/z | # | Formula                                                                         | Score  | m/z       | err [mDa] | err [ppm] | mSig ma | rdb  | e <sup>-</sup> Conf | N-R ule |
|-----------|---|---------------------------------------------------------------------------------|--------|-----------|-----------|-----------|---------|------|---------------------|---------|
| 917.35050 | 1 | C <sub>42</sub> H <sub>55</sub> BF <sub>2</sub> GaN <sub>8</sub> O <sub>8</sub> | 100.00 | 917.34724 | -3.3      | -3.6      | 408.2   | 19.5 | even                | ok      |

Fig. 2: HRMS spectrum of **6** (experimental and calculated).

## Mass Spectrum Report

### Analysis Info

Analysis Name 10cb\_693pneg.d  
 Method tune\_wide.m  
 Sample Name < No Sample >  
 Comment meoh

Acquisition Date 4/15/2010 3:06:57 PM

Operator Marie-José Penouilh  
 Instrument micrOTOF-Q 56

### Acquisition Parameter

|             |            |                       |           |                  |           |
|-------------|------------|-----------------------|-----------|------------------|-----------|
| Source Type | ESI        | Ion Polarity          | Negative  | Set Nebulizer    | 0.5 Bar   |
| Focus       | Not active | Set Capillary         | 4500 V    | Set Dry Heater   | 180 °C    |
| Scan Begin  | 50 m/z     | Set End Plate Offset  | -500 V    | Set Dry Gas      | 4.0 l/min |
| Scan End    | 3000 m/z   | Set Collision Cell RF | 200.0 Vpp | Set Divert Valve | Source    |

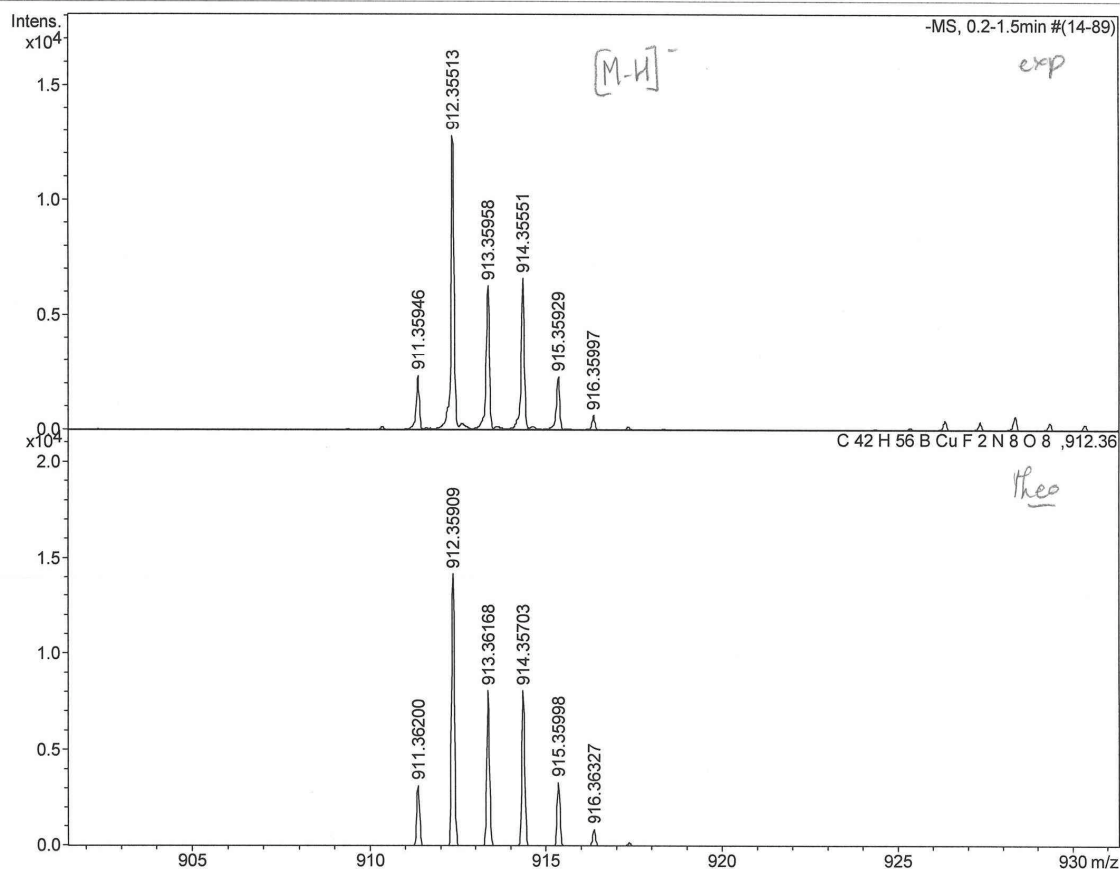

| Meas. m/z | # | Formula                                                                         | Score  | m/z       | err [mDa] | err [ppm] | mSigma | rdb  | e <sup>-</sup> Conf | N-Rule |
|-----------|---|---------------------------------------------------------------------------------|--------|-----------|-----------|-----------|--------|------|---------------------|--------|
| 912.35513 | 1 | C <sub>42</sub> H <sub>56</sub> BCuF <sub>2</sub> N <sub>8</sub> O <sub>8</sub> | 100.00 | 912.35908 | 3.9       | 4.3       | 43.5   | 18.0 | odd                 | ok     |

Fig. 3: HRMS spectrum of **7** (experimental and calculated).

I

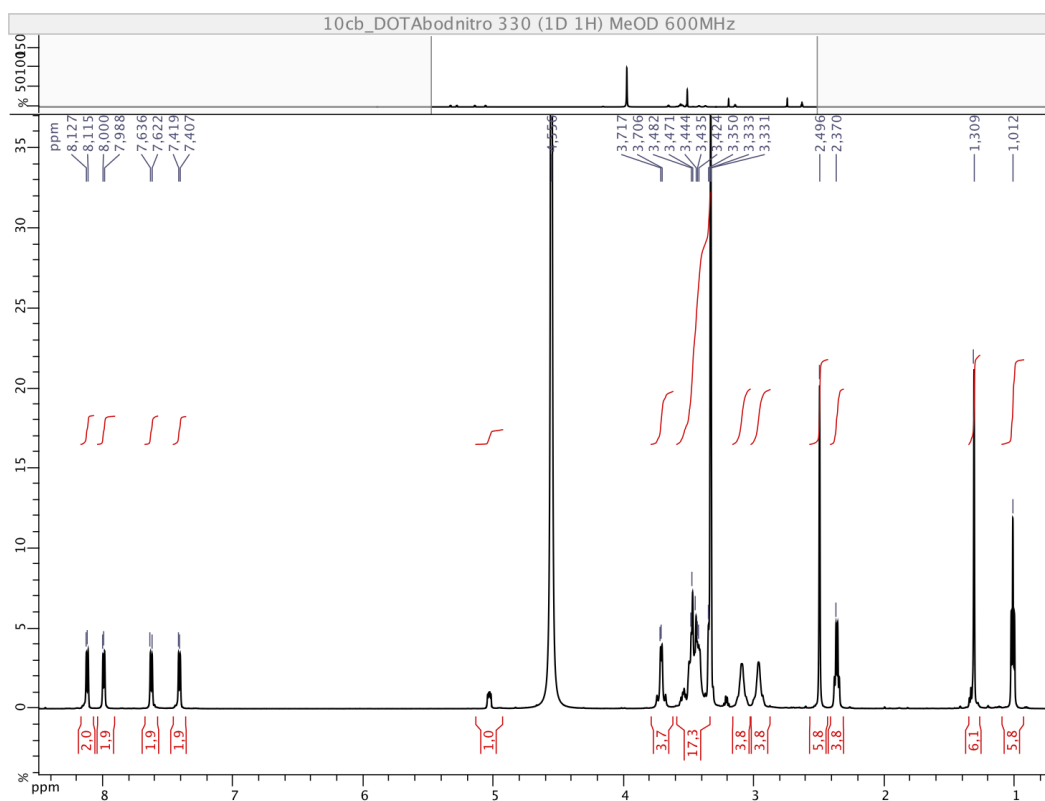Fig. 4:  $^1\text{H}$  NMR spectrum of **13** (600 MHz, MeOD, 330K).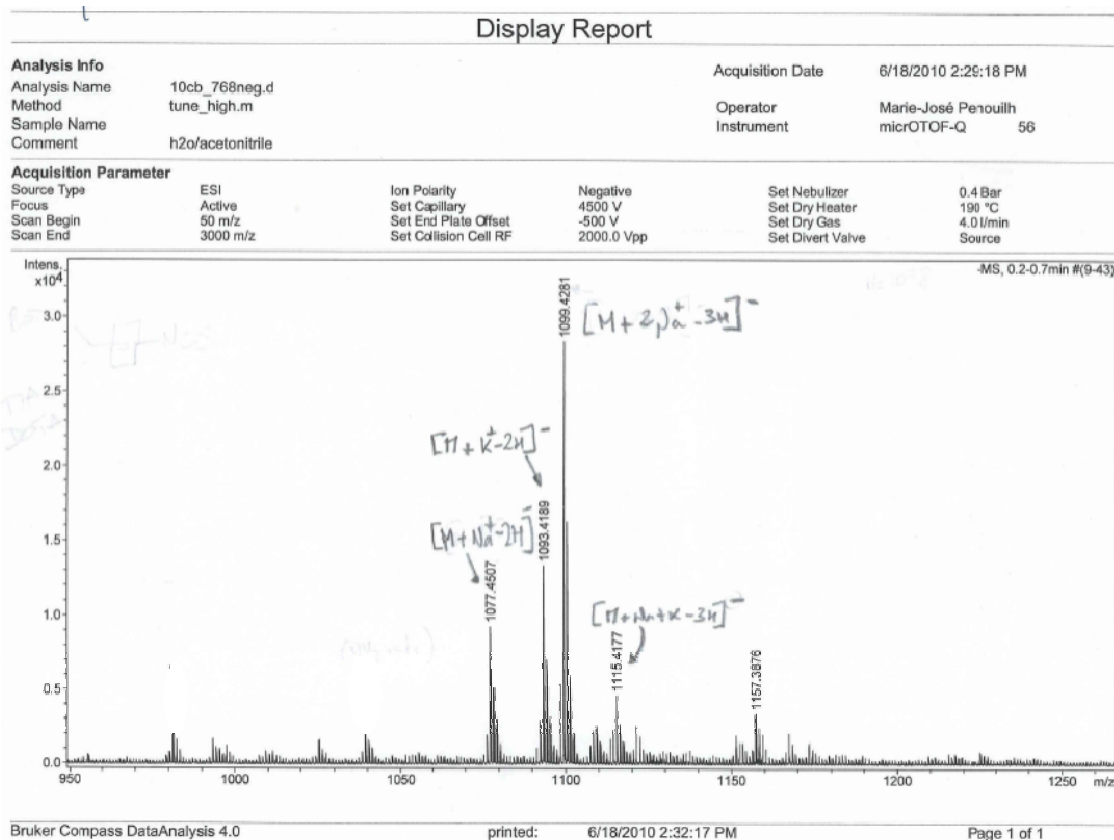Fig 5: ESI-MS spectrum of **15**

### Photophysical studies

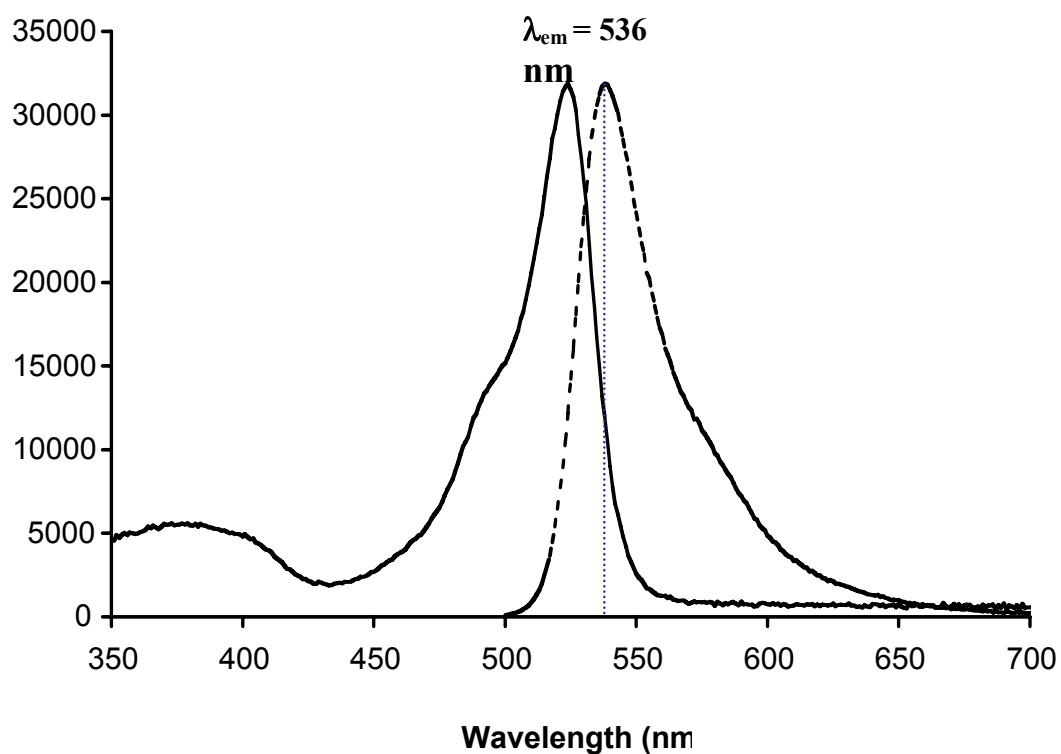

Fig.6: Absorption (—) and emission (---) of **4** in H<sub>2</sub>O

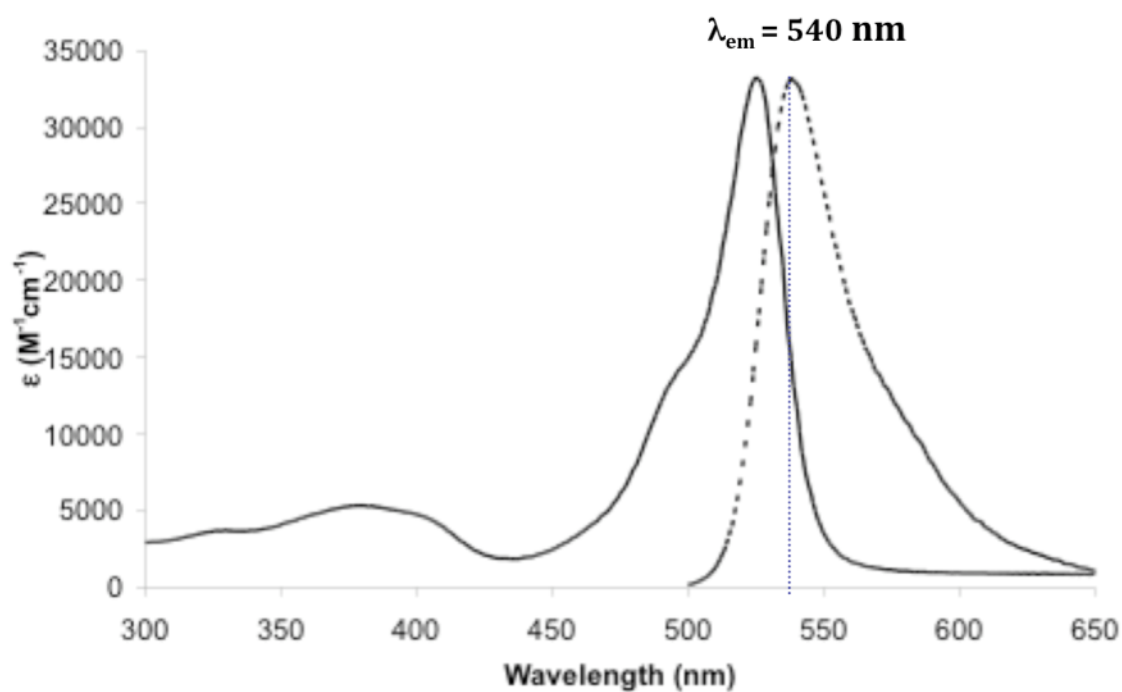

Fig.7: Absorption (—) and emission (---) of **5** in H<sub>2</sub>O.

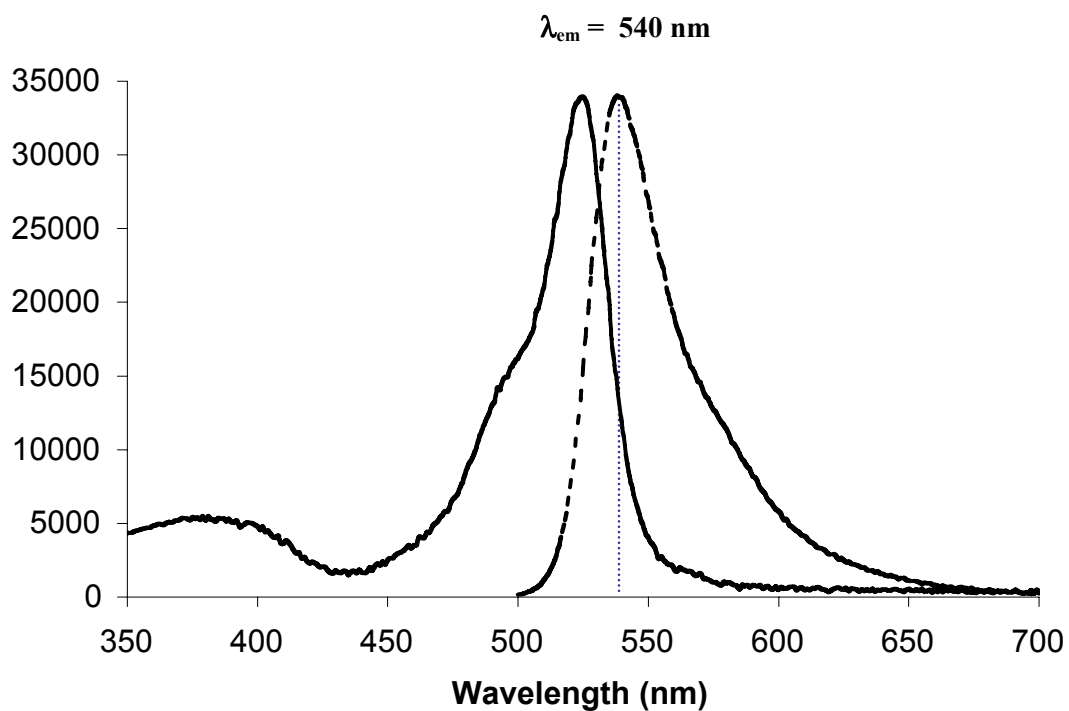

Fig.8: Absorption (—) and emission (---) of 6 in H<sub>2</sub>O

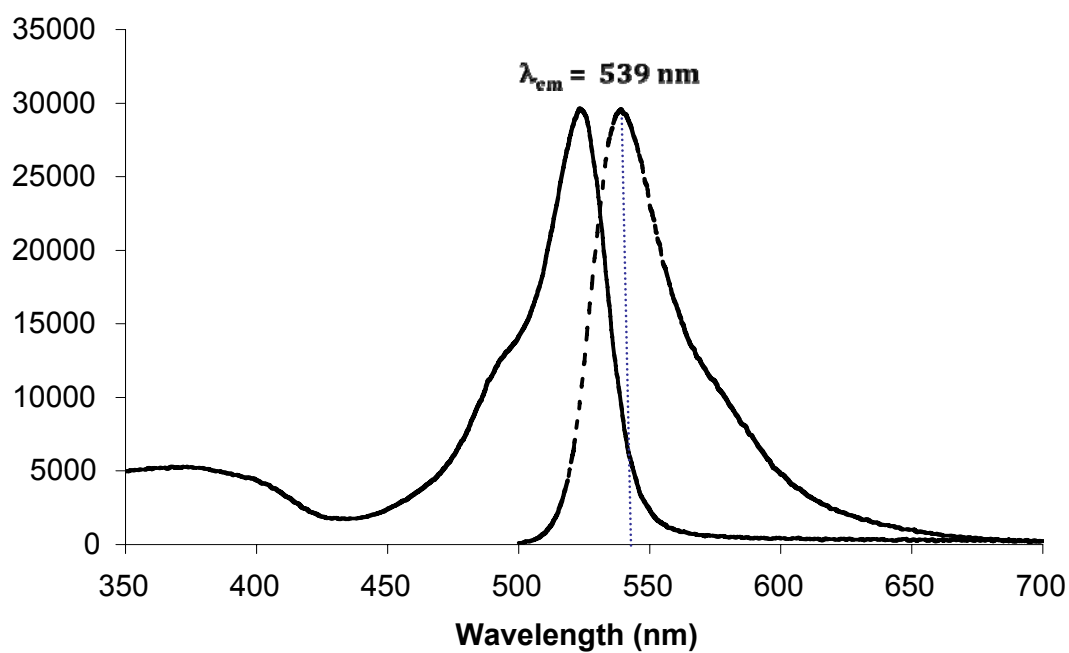

Fig. 9: Absorption (—) and emission (---) of 7 in H<sub>2</sub>O.

### X-ray analysis:

Ending amine of the ethylenediamine group and dichloromethane are disordered over two positions. The geometric parameters of disordered components in each group were restrained by using EADP constraints.<sup>iv</sup> In the final stages of refinement, the statistical fractions of the major and minor disordered components were 0.834(3)/0.166(3). Similar Uij constraints were applied within the disordered parts to maintain a reasonable model. An ORTEP view of the compound **11** with disordered part is drawn in **Figure 10**.

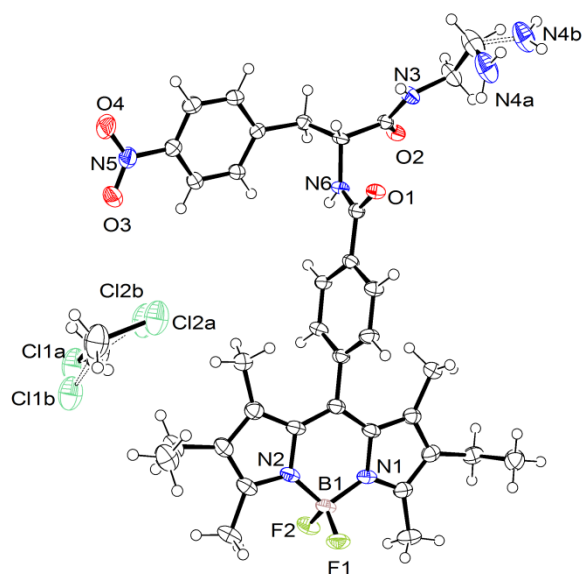

**Fig. 10:** ORTEP view of compound **11**, showing thermal ellipsoid at the 50% probability level.

Intermolecular hydrogen bonding, between the amide functions of neighboring molecules, involved in the crystal packing are shown in **Figure 11**. Intermolecular N-H...O distances are 2.886(4) Å and 2.941(4) Å for N3-O1 and N6-O2 respectively.

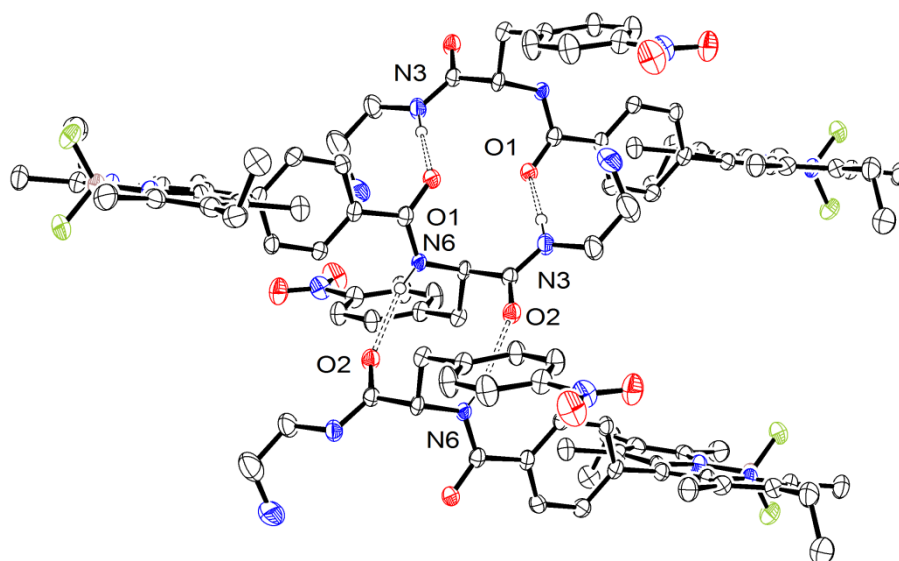

**Fig. 11:** ORTEP view of intermolecular H-bond in crystal of **11**, showing thermal ellipsoid at the 50% probability level. For clarity, only hydrogen involved in intermolecular hydrogen bonds are represented by dashed lines.

**Table 1.** Bond lengths [Å] and angles [°]  
 for **11**.

|              |          |              |          |
|--------------|----------|--------------|----------|
| C(1)-N(1)    | 1.355(6) | C(10)-H(10B) | 0.9800   |
| C(1)-C(2)    | 1.406(6) | C(10)-H(10C) | 0.9800   |
| C(1)-C(10)   | 1.495(6) | C(11)-C(12)  | 1.529(7) |
| C(2)-C(3)    | 1.392(6) | C(11)-H(11A) | 0.9900   |
| C(2)-C(11)   | 1.500(6) | C(11)-H(11B) | 0.9900   |
| C(3)-C(4)    | 1.425(6) | C(12)-H(12A) | 0.9800   |
| C(3)-C(13)   | 1.505(6) | C(12)-H(12B) | 0.9800   |
| C(4)-C(5)    | 1.400(6) | C(12)-H(12C) | 0.9800   |
| C(4)-N(1)    | 1.400(5) | C(13)-H(13A) | 0.9800   |
| C(5)-C(6)    | 1.400(6) | C(13)-H(13B) | 0.9800   |
| C(5)-C(18)   | 1.491(5) | C(13)-H(13C) | 0.9800   |
| C(6)-N(2)    | 1.402(5) | C(14)-H(14A) | 0.9800   |
| C(6)-C(7)    | 1.424(6) | C(14)-H(14B) | 0.9800   |
| C(7)-C(8)    | 1.390(6) | C(14)-H(14C) | 0.9800   |
| C(7)-C(14)   | 1.507(6) | C(15)-C(16)  | 1.516(7) |
| C(8)-C(9)    | 1.411(6) | C(15)-H(15A) | 0.9900   |
| C(8)-C(15)   | 1.517(7) | C(15)-H(15B) | 0.9900   |
| C(9)-N(2)    | 1.358(6) | C(16)-H(16A) | 0.9800   |
| C(9)-C(17)   | 1.492(6) | C(16)-H(16B) | 0.9800   |
| C(10)-H(10A) | 0.9800   | C(16)-H(16C) | 0.9800   |
|              |          | C(17)-H(17A) | 0.9800   |
|              |          | C(17)-H(17B) | 0.9800   |
|              |          | C(17)-H(17C) | 0.9800   |



Supplementary Material (ESI) for Chemical Communications  
This journal is (c) The Royal Society of Chemistry 2010

|              |          |                 |           |
|--------------|----------|-----------------|-----------|
| C(18)-C(23)  | 1.385(6) | C(36)-N(4B)     | 1.49(3)   |
| C(18)-C(19)  | 1.388(6) | C(36)-H(36A)    | 0.9900    |
| C(19)-C(20)  | 1.385(5) | C(36)-H(36B)    | 0.9900    |
| C(19)-H(19)  | 0.9500   | C(37A)-Cl(1A)   | 1.740(9)  |
| C(20)-C(21)  | 1.396(6) | C(37A)-Cl(2A)   | 1.785(12) |
| C(20)-H(20)  | 0.9500   | C(37A)-H(37A)   | 0.9900    |
| C(21)-C(22)  | 1.390(5) | C(37A)-H(37B)   | 0.9900    |
| C(21)-C(24)  | 1.504(5) | C(37B)-Cl(2B)   | 1.68(6)   |
| C(22)-C(23)  | 1.392(5) | C(37B)-Cl(1B)   | 1.84(5)   |
| C(22)-H(22)  | 0.9500   | C(37B)-H(37C)   | 0.9900    |
| C(23)-H(23)  | 0.9500   | C(37B)-H(37D)   | 0.9900    |
| C(24)-O(1)   | 1.238(5) | N(1)-B(1)       | 1.548(6)  |
| C(24)-N(6)   | 1.343(5) | N(2)-B(1)       | 1.542(6)  |
| C(25)-N(6)   | 1.458(4) | N(3)-H(3)       | 0.8800    |
| C(25)-C(34)  | 1.533(5) | N(4A)-H(4A1)    | 0.8800    |
| C(25)-C(26)  | 1.534(6) | N(4A)-H(4A2)    | 0.8800    |
| C(25)-H(25)  | 1.0000   | N(4B)-H(4B1)    | 0.8800    |
| C(26)-C(27)  | 1.511(6) | N(4B)-H(4B2)    | 0.8800    |
| C(26)-H(26A) | 0.9900   | N(5)-O(4)       | 1.223(5)  |
| C(26)-H(26B) | 0.9900   | N(5)-O(3)       | 1.228(5)  |
| C(27)-C(28)  | 1.393(6) | N(6)-H(6)       | 0.8800    |
| C(27)-C(32)  | 1.396(5) | F(1)-B(1)       | 1.390(5)  |
| C(28)-C(29)  | 1.372(6) | F(2)-B(1)       | 1.402(5)  |
| C(28)-H(28)  | 0.9500   |                 |           |
| C(29)-C(30)  | 1.387(6) | N(1)-C(1)-C(2)  | 110.3(4)  |
| C(29)-H(29)  | 0.9500   | N(1)-C(1)-C(10) | 122.0(4)  |
| C(30)-C(31)  | 1.380(6) | C(2)-C(1)-C(10) | 127.7(4)  |
| C(30)-N(5)   | 1.460(6) | C(3)-C(2)-C(1)  | 107.0(4)  |
| C(31)-C(32)  | 1.373(6) | C(3)-C(2)-C(11) | 127.3(4)  |
| C(31)-H(31)  | 0.9500   | C(1)-C(2)-C(11) | 125.6(4)  |
| C(32)-H(32)  | 0.9500   | C(2)-C(3)-C(4)  | 107.2(4)  |
| C(34)-O(2)   | 1.237(5) | C(2)-C(3)-C(13) | 123.6(4)  |
| C(34)-N(3)   | 1.317(5) | C(4)-C(3)-C(13) | 129.2(4)  |
| C(35)-N(3)   | 1.464(6) | C(5)-C(4)-N(1)  | 120.0(4)  |
| C(35)-C(36)  | 1.477(7) | C(5)-C(4)-C(3)  | 132.0(4)  |
| C(35)-H(35A) | 0.9900   | N(1)-C(4)-C(3)  | 107.9(4)  |
| C(35)-H(35B) | 0.9900   | C(4)-C(5)-C(6)  | 121.9(4)  |
| C(36)-N(4A)  | 1.384(8) | C(4)-C(5)-C(18) | 118.6(4)  |

Supplementary Material (ESI) for Chemical Communications  
This journal is (c) The Royal Society of Chemistry 2010

|                     |          |                     |          |
|---------------------|----------|---------------------|----------|
| C(6)-C(5)-C(18)     | 119.4(4) | C(7)-C(14)-H(14B)   | 109.5    |
| C(5)-C(6)-N(2)      | 119.9(4) | H(14A)-C(14)-H(14B) | 109.5    |
| C(5)-C(6)-C(7)      | 132.3(4) | C(7)-C(14)-H(14C)   | 109.5    |
| N(2)-C(6)-C(7)      | 107.8(4) | H(14A)-C(14)-H(14C) | 109.5    |
| C(8)-C(7)-C(6)      | 107.2(4) | H(14B)-C(14)-H(14C) | 109.5    |
| C(8)-C(7)-C(14)     | 123.9(4) | C(16)-C(15)-C(8)    | 113.8(4) |
| C(6)-C(7)-C(14)     | 128.8(4) | C(16)-C(15)-H(15A)  | 108.8    |
| C(7)-C(8)-C(9)      | 107.3(4) | C(8)-C(15)-H(15A)   | 108.8    |
| C(7)-C(8)-C(15)     | 127.2(4) | C(16)-C(15)-H(15B)  | 108.8    |
| C(9)-C(8)-C(15)     | 125.5(4) | C(8)-C(15)-H(15B)   | 108.8    |
| N(2)-C(9)-C(8)      | 109.7(4) | H(15A)-C(15)-H(15B) | 107.7    |
| N(2)-C(9)-C(17)     | 122.1(4) | C(15)-C(16)-H(16A)  | 109.5    |
| C(8)-C(9)-C(17)     | 128.1(4) | C(15)-C(16)-H(16B)  | 109.5    |
| C(1)-C(10)-H(10A)   | 109.5    | H(16A)-C(16)-H(16B) | 109.5    |
| C(1)-C(10)-H(10B)   | 109.5    | C(15)-C(16)-H(16C)  | 109.5    |
| H(10A)-C(10)-H(10B) | 109.5    | H(16A)-C(16)-H(16C) | 109.5    |
| C(1)-C(10)-H(10C)   | 109.5    | H(16B)-C(16)-H(16C) | 109.5    |
| H(10A)-C(10)-H(10C) | 109.5    | C(9)-C(17)-H(17A)   | 109.5    |
| H(10B)-C(10)-H(10C) | 109.5    | C(9)-C(17)-H(17B)   | 109.5    |
| C(2)-C(11)-C(12)    | 112.7(4) | H(17A)-C(17)-H(17B) | 109.5    |
| C(2)-C(11)-H(11A)   | 109.1    | C(9)-C(17)-H(17C)   | 109.5    |
| C(12)-C(11)-H(11A)  | 109.1    | H(17A)-C(17)-H(17C) | 109.5    |
| C(2)-C(11)-H(11B)   | 109.1    | H(17B)-C(17)-H(17C) | 109.5    |
| C(12)-C(11)-H(11B)  | 109.1    | C(23)-C(18)-C(19)   | 119.7(4) |
| H(11A)-C(11)-H(11B) | 107.8    | C(23)-C(18)-C(5)    | 118.4(4) |
| C(11)-C(12)-H(12A)  | 109.5    | C(19)-C(18)-C(5)    | 121.9(4) |
| C(11)-C(12)-H(12B)  | 109.5    | C(20)-C(19)-C(18)   | 120.0(4) |
| H(12A)-C(12)-H(12B) | 109.5    | C(20)-C(19)-H(19)   | 120.0    |
| C(11)-C(12)-H(12C)  | 109.5    | C(18)-C(19)-H(19)   | 120.0    |
| H(12A)-C(12)-H(12C) | 109.5    | C(19)-C(20)-C(21)   | 120.5(4) |
| H(12B)-C(12)-H(12C) | 109.5    | C(19)-C(20)-H(20)   | 119.8    |
| C(3)-C(13)-H(13A)   | 109.5    | C(21)-C(20)-H(20)   | 119.8    |
| C(3)-C(13)-H(13B)   | 109.5    | C(22)-C(21)-C(20)   | 119.5(4) |
| H(13A)-C(13)-H(13B) | 109.5    | C(22)-C(21)-C(24)   | 122.6(4) |
| C(3)-C(13)-H(13C)   | 109.5    | C(20)-C(21)-C(24)   | 117.9(4) |
| H(13A)-C(13)-H(13C) | 109.5    | C(21)-C(22)-C(23)   | 119.6(4) |
| H(13B)-C(13)-H(13C) | 109.5    | C(21)-C(22)-H(22)   | 120.2    |
| C(7)-C(14)-H(14A)   | 109.5    | C(23)-C(22)-H(22)   | 120.2    |

Supplementary Material (ESI) for Chemical Communications  
This journal is (c) The Royal Society of Chemistry 2010

|                     |          |                      |           |
|---------------------|----------|----------------------|-----------|
| C(18)-C(23)-C(22)   | 120.7(4) | N(3)-C(34)-C(25)     | 116.3(3)  |
| C(18)-C(23)-H(23)   | 119.6    | N(3)-C(35)-C(36)     | 111.3(4)  |
| C(22)-C(23)-H(23)   | 119.6    | N(3)-C(35)-H(35A)    | 109.4     |
| O(1)-C(24)-N(6)     | 122.1(3) | C(36)-C(35)-H(35A)   | 109.4     |
| O(1)-C(24)-C(21)    | 121.1(4) | N(3)-C(35)-H(35B)    | 109.4     |
| N(6)-C(24)-C(21)    | 116.8(3) | C(36)-C(35)-H(35B)   | 109.4     |
| N(6)-C(25)-C(34)    | 110.3(3) | H(35A)-C(35)-H(35B)  | 108.0     |
| N(6)-C(25)-C(26)    | 109.8(3) | N(4A)-C(36)-C(35)    | 111.2(5)  |
| C(34)-C(25)-C(26)   | 108.1(3) | N(4A)-C(36)-N(4B)    | 78.3(13)  |
| N(6)-C(25)-H(25)    | 109.5    | C(35)-C(36)-N(4B)    | 120.0(12) |
| C(34)-C(25)-H(25)   | 109.5    | N(4A)-C(36)-H(36A)   | 109.4     |
| C(26)-C(25)-H(25)   | 109.5    | C(35)-C(36)-H(36A)   | 109.4     |
| C(27)-C(26)-C(25)   | 112.6(3) | N(4B)-C(36)-H(36A)   | 31.3      |
| C(27)-C(26)-H(26A)  | 109.1    | N(4A)-C(36)-H(36B)   | 109.4     |
| C(25)-C(26)-H(26A)  | 109.1    | C(35)-C(36)-H(36B)   | 109.4     |
| C(27)-C(26)-H(26B)  | 109.1    | N(4B)-C(36)-H(36B)   | 123.1     |
| C(25)-C(26)-H(26B)  | 109.1    | H(36A)-C(36)-H(36B)  | 108.0     |
| H(26A)-C(26)-H(26B) | 107.8    | Cl(1A)-C(37A)-Cl(2A) | 110.1(5)  |
| C(28)-C(27)-C(32)   | 118.8(4) | Cl(1A)-C(37A)-H(37A) | 109.6     |
| C(28)-C(27)-C(26)   | 120.4(4) | Cl(2A)-C(37A)-H(37A) | 109.6     |
| C(32)-C(27)-C(26)   | 120.8(4) | Cl(1A)-C(37A)-H(37B) | 109.6     |
| C(29)-C(28)-C(27)   | 121.2(4) | Cl(2A)-C(37A)-H(37B) | 109.6     |
| C(29)-C(28)-H(28)   | 119.4    | H(37A)-C(37A)-H(37B) | 108.2     |
| C(27)-C(28)-H(28)   | 119.4    | Cl(2B)-C(37B)-Cl(1B) | 114(2)    |
| C(28)-C(29)-C(30)   | 118.5(4) | Cl(2B)-C(37B)-H(37C) | 108.8     |
| C(28)-C(29)-H(29)   | 120.7    | Cl(1B)-C(37B)-H(37C) | 108.8     |
| C(30)-C(29)-H(29)   | 120.7    | Cl(2B)-C(37B)-H(37D) | 108.8     |
| C(31)-C(30)-C(29)   | 121.7(4) | Cl(1B)-C(37B)-H(37D) | 108.8     |
| C(31)-C(30)-N(5)    | 119.3(4) | H(37C)-C(37B)-H(37D) | 107.7     |
| C(29)-C(30)-N(5)    | 119.1(4) | C(1)-N(1)-C(4)       | 107.6(4)  |
| C(32)-C(31)-C(30)   | 119.1(4) | C(1)-N(1)-B(1)       | 127.0(3)  |
| C(32)-C(31)-H(31)   | 120.4    | C(4)-N(1)-B(1)       | 125.3(4)  |
| C(30)-C(31)-H(31)   | 120.4    | C(9)-N(2)-C(6)       | 107.9(4)  |
| C(31)-C(32)-C(27)   | 120.6(4) | C(9)-N(2)-B(1)       | 126.7(3)  |
| C(31)-C(32)-H(32)   | 119.7    | C(6)-N(2)-B(1)       | 125.4(4)  |
| C(27)-C(32)-H(32)   | 119.7    | C(34)-N(3)-C(35)     | 121.6(4)  |
| O(2)-C(34)-N(3)     | 123.8(4) | C(34)-N(3)-H(3)      | 119.2     |
| O(2)-C(34)-C(25)    | 119.9(3) | C(35)-N(3)-H(3)      | 119.2     |

Supplementary Material (ESI) for Chemical Communications  
This journal is (c) The Royal Society of Chemistry 2010

|                     |          |
|---------------------|----------|
| C(36)-N(4A)-H(4A1)  | 120.0    |
| C(36)-N(4A)-H(4A2)  | 120.0    |
| H(4A1)-N(4A)-H(4A2) | 120.0    |
| C(36)-N(4B)-H(4B1)  | 120.0    |
| C(36)-N(4B)-H(4B2)  | 120.0    |
| H(4B1)-N(4B)-H(4B2) | 120.0    |
| O(4)-N(5)-O(3)      | 122.9(4) |
| O(4)-N(5)-C(30)     | 118.8(4) |
| O(3)-N(5)-C(30)     | 118.3(4) |
| C(24)-N(6)-C(25)    | 121.5(3) |
| C(24)-N(6)-H(6)     | 119.3    |
| C(25)-N(6)-H(6)     | 119.3    |
| F(1)-B(1)-F(2)      | 108.7(3) |
| F(1)-B(1)-N(2)      | 110.6(4) |
| F(2)-B(1)-N(2)      | 109.9(4) |
| F(1)-B(1)-N(1)      | 110.8(4) |
| F(2)-B(1)-N(1)      | 109.4(4) |
| N(2)-B(1)-N(1)      | 107.4(3) |

**Table 2.** Hydrogen bonds for **11** [Å and °].

| D-H...A                 | d(D-H) | d(H...A) | d(D...A) | <(DHA) |
|-------------------------|--------|----------|----------|--------|
| N(3)-H(3)...O(1)#1      | 0.88   | 2.01     | 2.886(4) | 172.2  |
| N(4B)-H(4B2)...Cl(2B)#1 | 0.88   | 2.55     | 3.31(3)  | 143.8  |
| N(6)-H(6)...O(2)#2      | 0.88   | 2.08     | 2.941(4) | 166.5  |

Symmetry transformations used to generate equivalent atoms:

#1 -x+1,-y,-z+3 #2 -x+2,-y,-z+3

## Notes

---

<sup>i</sup> J. III. Olmsted, *J. Phys. Chem.*, 1979, **83**, 2581-2582.

<sup>ii</sup> Z. Otwinowski, W. Minor, C. W. Carter Jr, *Methods in Enzymology*. 1997, **276**, 307-326.

<sup>iii</sup> A. Altomare, G. Cascarano, C. Giacovazzo, A. Guagliardi, *J. Appl. Crystallogr.*, 1993, **26**, 343-350.

<sup>iv</sup> (a) G. Sheldrock, *Acta. Cryst. Sect. A.*, 2008, **64**, 112-122; (b) G. M. Sheldrick, *SHELX-97, Program for the refinement of Crystal Structures*, 1997, University of Göttingen, Göttingen, Germany.

<sup>v</sup> M. Brellier, G. Duportail, R. Baati, *Tetrahedron Lett.*, 2010, **51**, 1269-1272.

<sup>vi</sup> S. L. Niu, G. Ulrich, R. Ziessel, A. Kiss, P. Y. Renard, A. Romieu, *Org. Lett.* 2009, **11**, 2049-2052.

<sup>vii</sup> J. P. André, C. F. G. C. Geraldés, J. A. Martins, A. E. Merbach, M. I. M. Prata, A. C. Santos,

J. J. P. de Lima, E. Toth, *Chem. Eur. J.*, 2004, **10**, 5804-5816.

<sup>viii</sup> C. Li, P. Winnard Jr, Z. M. Bhujwalla, *Tetrahedron. Lett.* 2009, **50**, 2929-2931.
